# Supplementary material
Source: PubMed Central journal article supplement (PMC6125531)
Supplement: zac009187412s1.pdf [file zac009187412s1.pdf]

**Table S1.** Primers used in the study

| <b>Primer</b> | <b>Nucleotide sequence (5' to 3')</b> |
|---------------|---------------------------------------|
| AmpC-C2-RT_F  | GCCGCACTACTTTACCTTCG                  |
| AmpC-C2-RT_R  | TACGCCGGTGAAGGTTTAC                   |
| AmpC-C3-RT_F  | CAACGCCAGTATCGGTCTTT                  |
| AmpC-C3-RT_R  | GCTTTCGGAACGTTAATCCA                  |
| AmpC-C4-RT_F  | CGGTGGCGGTAATTTATCAG                  |
| AmpC-C4-RT_R  | GTACGCCGGTGAAGGTTTTA                  |
| AmpC-C5-RT_F  | ATTAACGTTCCGAAGGCAGA                  |
| AmpC-C5-RT_R  | CTCGCCATATCCTTCACGTT                  |
| AmpC-C6-RT_F  | GATATGGCGAACTGGGTCAT                  |
| AmpC-C6-RT_R  | CAGCCCAGACCCTGATACAT                  |
| AmpC-C8-RT_F  | GGCTATCGTGACGGTAAAGC                  |
| AmpC-C8-RT_R  | TAAGTGAGGCATCAGCAACG                  |
| RpoB-ECC_F    | AAGGCGAATCCAGCTTGTTTCAGC              |
| RpoB-ECC_R    | TGACGTTGCATGTTTCGCACCCATCA            |

**Table S2.** ECC strains included in the study according to their cluster memberships and phenotypes of resistance to third-generation cephalosporins

| Cluster      | No.       | Phenotype |            |              |           |
|--------------|-----------|-----------|------------|--------------|-----------|
|              |           | WT        | ESBL alone | ESBL+HL-CASE | HL-CASE   |
| C-I          | 3         | 2         | 0          | 0            | 1         |
| C-II         | 4         | 2         | 0          | 0            | 2         |
| C-III        | 20        | 4         | 3          | 4            | 9         |
| C-IV         | 4         | 2         | 0          | 0            | 2         |
| C-V          | 6         | 2         | 0          | 0            | 4         |
| C-VI         | 19        | 3         | 2          | 10           | 4         |
| C-VII        | 2         | 2         | 0          | 0            | 0         |
| C-VIII       | 26        | 5         | 4          | 5            | 12        |
| C-IX         | 2         | 2         | 0          | 0            | 0         |
| C-X          | 2         | 2         | 0          | 0            | 0         |
| C-XI         | 4         | 4         | 0          | 0            | 0         |
| C-XII        | 2         | 2         | 0          | 0            | 0         |
| <b>Total</b> | <b>94</b> | <b>32</b> | <b>9</b>   | <b>19</b>    | <b>34</b> |

**Table S3.** Characteristics of ESBL-producing strains

| <b><math>\beta</math>-lactamase(s) detected</b> | <b>No.</b> | <b>Cluster (no.)</b>             |
|-------------------------------------------------|------------|----------------------------------|
| CTX-M-9                                         | 2          | C-III (2)                        |
| TEM-15                                          | 1          | C-III (1)                        |
| CTX-M-15                                        | 15         | C-III (3), C-VI (10), C-VIII (2) |
| SHV-12                                          | 8          | C-III (1), C-VIII (7)            |
| CTX-M-15, OXA-204, CMY-4                        | 1          | C-VI (1)*                        |
| CTX-M-15, SHV-12, DHA-1                         | 1          | C-VI (1)*                        |

\*AmpC-overproducing strains.
